# Supplementary material
Source: PubMed Central journal article supplement (PMC5652968)
Supplement: supp_WNL.0000000000004425_e-tables.pdf [file supp_WNL.0000000000004425_e-tables.pdf]

**Table e-1.** Clusters of reduced FDG-PET glucose metabolism in women as compared to men.

| <b>Cluster extent</b> | <b>T</b> | <b>Z<sup>†</sup></b> | <b>Talairach coordinates*</b> | <b>Hemisphere</b> | <b>Anatomical area</b> | <b>Brodmann Area</b> |
|-----------------------|----------|----------------------|-------------------------------|-------------------|------------------------|----------------------|
| 38                    | 3.85     | 3.59                 | -36 5 60                      | Left              | Middle Frontal Gyrus   | BA 8                 |
| 69                    | 3.77     | 3.53                 | 35 30 49                      | Right             | Superior Frontal Gyrus | BA 8                 |
| 25                    | 3.37     | 3.19                 | 33 39 29                      | Right             | Middle Frontal Gyrus   | BA 9                 |

\*Coordinates (x, y, z) from Talairach and Tournoux. †Z values at the peak of maximum significance at  $p < 0.001$ , corrected for the search volume. Only contrasts yielding significant results are reported.

**Table e-2.** Clusters of increased PiB-PET uptake in women as compared to men.

| <b>Cluster extent</b> | <b>T</b> | <b>Z<sup>†</sup></b> | <b>Talairach coordinates*</b> | <b>Hemisphere</b> | <b>Anatomical area</b> | <b>Brodmann Area</b> |
|-----------------------|----------|----------------------|-------------------------------|-------------------|------------------------|----------------------|
| 56                    | 4.13     | 3.82                 | 4 8 44                        | Right             | Medial Frontal Gyrus   | BA 32                |
|                       | 3.66     | 3.44                 | 2 17 43                       | Right             | Medial Frontal Gyrus   | BA 8                 |
| 31                    | 4.05     | 3.76                 | 50 -48 -18                    | Right             | Fusiform Gyrus         | BA 37                |
| 86                    | 3.99     | 3.71                 | 10 -64 11                     | Right             | Posterior Cingulate    | BA 30                |
| 37                    | 3.82     | 3.57                 | 30 -45 -10                    | Right             | Parahippocampal Gyrus  | BA 37                |
| 32                    | 3.69     | 3.46                 | 10 -36 2                      | Right             | Parahippocampal Gyrus  | BA 27                |
| 32                    | 3.63     | 3.41                 | -21 -60 -9                    | Left              | Fusiform Gyrus         | BA 19                |
| 28                    | 3.45     | 3.26                 | 3 -19 49                      | Right             | Medial Frontal Gyrus   | BA 8                 |

\*Coordinates (x, y, z) from Talairach and Tournoux. †Z values at the peak of maximum significance at  $p < 0.001$ , corrected for the search volume. Only contrasts yielding significant results are reported.

**Table e-3.** Clusters of reduced MRI gray matter volumes in women as compared to men.

| <b>Cluster extent</b> | <b>T</b> | <b>Z<sup>†</sup></b> | <b>Talairach coordinates*</b> | <b>Hemisphere</b> | <b>Anatomical area</b>   | <b>Brodmann Area</b> |
|-----------------------|----------|----------------------|-------------------------------|-------------------|--------------------------|----------------------|
| 362                   | 7.13     | 5.93                 | -27 32 -7                     | Left              | Inferior Frontal Gyrus   | BA 47                |
|                       | 5.12     | 4.59                 | -36 29 -9                     | Left              | Inferior Frontal Gyrus   | BA 47                |
| 74                    | 5.54     | 4.89                 | -39 -47 19                    | Left              | Superior Temporal Gyrus  | BA 13                |
| 534                   | 5.48     | 4.85                 | 34 31 -9                      | Right             | Inferior Frontal Gyrus   | BA 47                |
|                       | 5.13     | 4.59                 | 27 32 -3                      | Right             | Inferior Frontal Gyrus   | BA 47                |
|                       | 5.03     | 4.52                 | 16 52 -14                     | Right             | Superior Frontal Gyrus   | BA 11                |
| 190                   | 5.11     | 4.58                 | -20 42 -11                    | Left              | Middle Frontal Gyrus     | BA 11                |
|                       | 5.10     | 4.57                 | -10 26 -11                    | Left              | Medial Frontal Gyrus     | BA 11                |
|                       | 4.77     | 4.33                 | -9 38 -17                     | Left              | Inferior Frontal Gyrus   | BA 11                |
| 45                    | 4.96     | 4.46                 | -24 -70 20                    | Left              | Precuneus                | BA 31                |
|                       | 3.66     | 3.44                 | -18 -75 27                    | Left              | Precuneus                | BA 31                |
| 273                   | 4.90     | 4.42                 | 50 -4 -23                     | Right             | Fusiform Gyrus           | BA 20                |
|                       | 4.68     | 4.25                 | 39 -5 -27                     | Right             | Middle Temporal Gyrus    | BA 21                |
|                       | 4.55     | 4.15                 | 38 1 -30                      | Right             | Middle Temporal Gyrus    | BA 21                |
| 195                   | 4.72     | 4.28                 | 21 -51 30                     | Right             | Precuneus                | BA 31                |
|                       | 4.11     | 3.81                 | 14 -54 34                     | Right             | Precuneus                | BA 31                |
| 105                   | 4.64     | 4.22                 | 12 26 -13                     | Right             | Medial Frontal Gyrus     | BA 25                |
|                       | 3.83     | 3.58                 | 15 38 -19                     | Right             | Inferior Frontal Gyrus   | BA 11                |
| 86                    | 4.56     | 4.17                 | -38 -5 -27                    | Left              | Middle Temporal Gyrus    | BA 21                |
| 66                    | 4.56     | 4.16                 | 48 -34 33                     | Right             | Inferior Parietal Lobule | BA 40                |
|                       | 4.14     | 3.83                 | 44 -32 26                     | Right             | Inferior Parietal Lobule | BA 40                |
| 40                    | 4.55     | 4.15                 | 12 -24 56                     | Right             | Medial Frontal Gyrus     | BA 6                 |

|     |      |      |            |       |                         |       |
|-----|------|------|------------|-------|-------------------------|-------|
| 123 | 4.54 | 4.14 | -10 47 21  | Left  | Medial Frontal Gyrus    | BA 9  |
|     | 4.02 | 3.74 | -12 55 8   | Left  | Medial Frontal Gyrus    | BA 10 |
| 48  | 4.53 | 4.14 | -50 -30 4  | Left  | Superior Temporal Gyrus | BA 22 |
|     | 3.58 | 3.37 | -50 -37 10 | Left  | Superior Temporal Gyrus | BA 22 |
| 177 | 4.31 | 3.96 | 18 44 3    | Right | Medial Frontal Gyrus    | BA 10 |
|     | 4.07 | 3.78 | 16 56 -8   | Right | Superior Frontal Gyrus  | BA 11 |
|     | 3.74 | 3.50 | 26 46 -7   | Right | Middle Frontal Gyrus    | BA 11 |
| 45  | 4.23 | 3.90 | 26 -69 18  | Right | Cuneus                  | BA 18 |
|     | 4.09 | 3.79 | 20 -73 23  | Right | Precuneus               | BA 31 |
| 51  | 4.22 | 3.90 | -16 -45 31 | Left  | Precuneus               | BA 31 |
| 31  | 4.04 | 3.75 | -10 -41 22 | Left  | Cingulate Gyrus         | BA 31 |
|     | 3.81 | 3.56 | -4 -32 24  | Left  | Posterior Cingulate     | BA 23 |
| 28  | 3.85 | 3.59 | 10 -43 22  | Right | Posterior Cingulate     | BA 23 |

\*Coordinates (x, y, z) from Talairach and Tournoux. †Z values at the peak of maximum significance at  $p < 0.001$ , corrected for the search volume. Only contrasts yielding significant results are reported. Gray matter volumes are adjusted for age and total intracranial volume.

**Table e-4.** Prediction of group membership using AD biomarkers

|                                        | <b>% Sensitivity</b> | <b>% Specificity</b> | <b>% Accuracy</b> | <b>P value</b> | <b>Relative Risk</b> | <b>95% CI</b> |
|----------------------------------------|----------------------|----------------------|-------------------|----------------|----------------------|---------------|
| <b>Women vs Men</b>                    |                      |                      |                   |                |                      |               |
| PiB uptake<br><i>Cut-off=1.22 SUVR</i> | 97                   | 63                   | 86                | <0.001         | 2.6                  | 1.5-4.8       |
| FDG uptake<br><i>Cut-off=1.37 SUVR</i> | 87                   | 42                   | 72                | <0.001         | 2.1                  | 1.2-3.6       |
| GMV<br><i>Cut-off=1.02 cc</i>          | 55                   | 47                   | 52                | n.s.           | 1.1                  | 0.6-1.8       |
| WMV<br><i>Cut-off=0.79 cc</i>          | 92                   | 68                   | 84                | <0.001         | 2.9                  | 1.5-5.7       |
| Combined WMV and<br>FDG uptake         | 95                   | 79                   | 90                | <0.001         | 4.5                  | 1.9-10.8      |
| <b>Menopausal women vs Men</b>         |                      |                      |                   |                |                      |               |
| PiB uptake<br><i>Cut-off=1.41 SUVR</i> | 83                   | 89                   | 87                | <0.001         | 7.5                  | 2.0-28.4      |
| FDG uptake<br><i>Cut-off=1.51 SUVR</i> | 92                   | 89                   | 90                | <0.001         | 8.3                  | 2.2-30.8      |
| GMV<br><i>Cut-off=1.03 cc</i>          | 75                   | 89                   | 83                | 0.002          | 6.8                  | 1.8-30.0      |
| WMV<br><i>Cut-off=0.77 cc</i>          | 75                   | 89                   | 83                | <0.001         | 6.8                  | 1.8-30.0      |
| Combined PiB, WMV<br>and FDG uptake    | 100                  | 100                  | 100               | <0.001         | 36.5                 | 2.3-564.3     |
| <b>Perimenopausal women vs Men</b>     |                      |                      |                   |                |                      |               |
| PiB uptake<br><i>Cut-off=1.20 SUVR</i> | 85                   | 89                   | 87                | <0.001         | 7.6                  | 2.0-28.7      |
| FDG uptake<br><i>Cut-off=1.44 SUVR</i> | 54                   | 83                   | 71                | 0.01           | 3.2                  | 1.0-10.2      |
| GMV<br><i>Cut-off=1.01 cc</i>          | 54                   | 67                   | 61                | n.s.           | 1.6                  | 0.7-3.7       |
| WMV<br><i>Cut-off=0.77 cc</i>          | 85                   | 89                   | 87                | <0.001         | 7.6                  | 2.0-28.7      |
| <b>Premenopausal women vs Men</b>      |                      |                      |                   |                |                      |               |
| PiB uptake<br><i>Cut-off=1.08 SUVR</i> | 71                   | 78                   | 75                | <0.001         | 3.2                  | 1.3-8.1       |
| FDG uptake<br><i>Cut-off=1.38 SUVR</i> | 79                   | 78                   | 78                | <0.001         | 3.5                  | 1.4-8.8       |

|                                              |     |     |     |        |      |           |
|----------------------------------------------|-----|-----|-----|--------|------|-----------|
| GMV<br><i>Cut-off=1.01 cc</i>                | 57  | 67  | 63  | n.s.   | 1.7  | 0.8-3.8   |
| WMV<br><i>Cut-off=0.81 cc</i>                | 93  | 94  | 94  | <0.001 | 16.7 | 2.4-112.9 |
| Combined WMV and<br>FDG uptake               | 100 | 100 | 100 | <0.001 | 26.7 | 2.4-567.1 |
| <b>Menopausal vs Premenopausal women</b>     |     |     |     |        |      |           |
| PiB uptake<br><i>Cut-off=1.19 SUVR</i>       | 92  | 93  | 92  | <0.001 | 12.8 | 1.9-85.5  |
| FDG uptake<br><i>Cut-off=1.44 SUVR</i>       | 92  | 100 | 96  | <0.001 | 26.5 | 1.7-407.9 |
| GMV<br><i>Cut-off=1.01 cc</i>                | 50  | 71  | 62  | 0.09   | 2.0  | 0.8-5.3   |
| WMV<br><i>Cut-off=0.77 cc</i>                | 83  | 75  | 77  | <0.001 | 2.9  | 1.2-6.9   |
| Combined PiB and<br>FDG uptake               | 92  | 100 | 96  | <0.001 | 26.5 | 1.7-407.9 |
| <b>Perimenopausal vs Premenopausal women</b> |     |     |     |        |      |           |
| PiB uptake<br><i>Cut-off=0.86 SUVR</i>       | 85  | 93  | 89  | <0.001 | 11.9 | 1.8-79.4  |
| FDG uptake<br><i>Cut-off=1.37 SUVR</i>       | 77  | 71  | 74  | 0.05   | 2.7  | 1.2-6.5   |
| GMV<br><i>Cut-off=1.25 cc</i>                | 46  | 86  | 67  | 0.02   | 3.2  | 0.8-13.2  |
| WMV<br><i>Cut-off=0.80 cc</i>                | 85  | 71  | 78  | <0.001 | 3.0  | 1.3-7.0   |
| <b>Menopausal vs Perimenopausal women</b>    |     |     |     |        |      |           |
| PiB uptake<br><i>Cut-off=1.56 SUVR</i>       | 85  | 75  | 80  | <0.001 | 4.9  | 1.3-18.2  |
| FDG uptake<br><i>Cut-off=1.63 SUVR</i>       | 92  | 77  | 84  | <0.001 | 4.0  | 1.5-10.9  |
| GMV<br><i>Cut-off=1.01 cc</i>                | 42  | 77  | 60  | n.s.   | 1.8  | 0.5-6.0   |
| WMV<br><i>Cut-off=0.71 cc</i>                | 42  | 69  | 56  | n.s.   | 1.4  | 0.5-3.9   |
