# Supplementary material
Source: PubMed Central journal article supplement (PMC5652968)
Supplement: supp_WNL.0000000000004425_Figure_e-1.pdf [file supp_WNL.0000000000004425_Figure_e-1.pdf]

**Figure e-1.** APOE status effects on PiB deposition by clinical group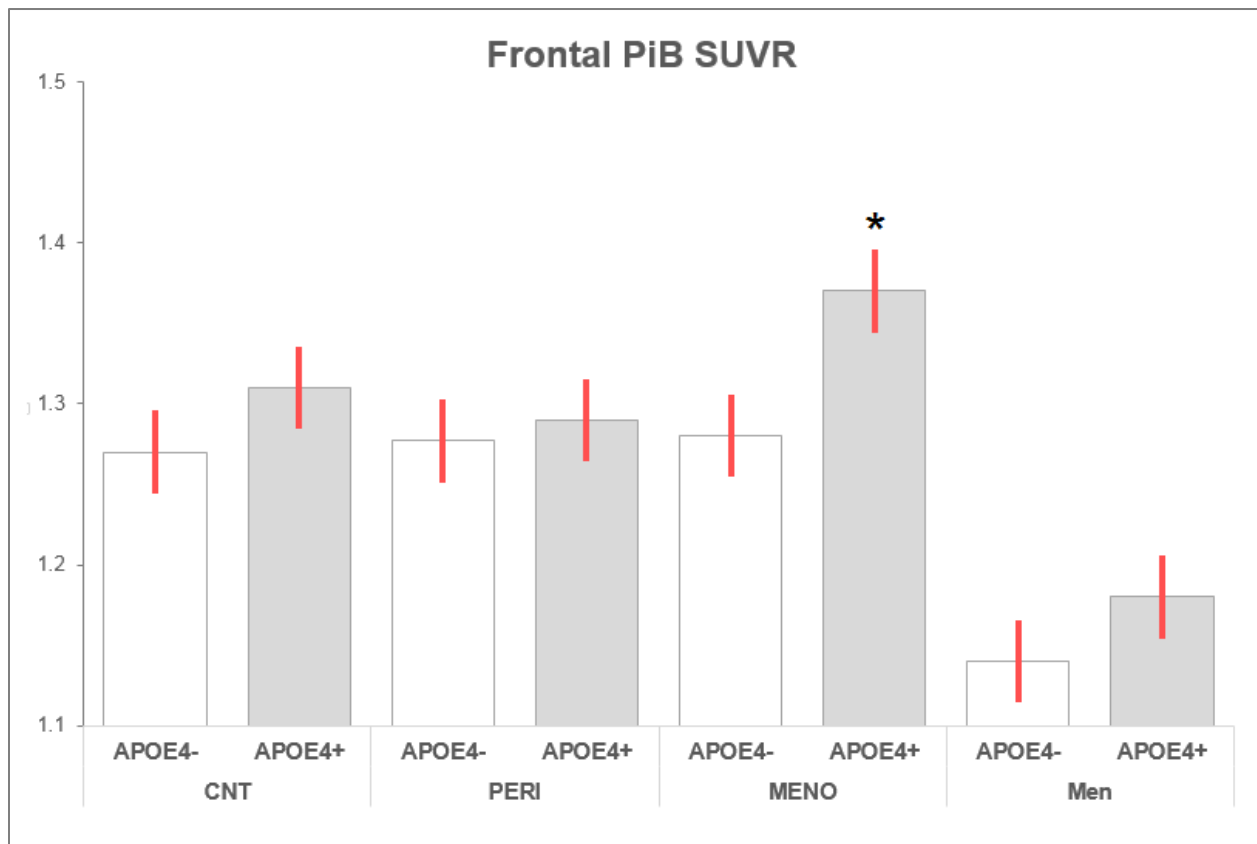

PiB retention extracted from the clusters showing maximal statistical differences across groups, as a function of APOE genotype. PiB measures are cortical-to-cerebellar PiB standardized uptake value ratios (unitless). Values are means and SEM.

\*Significant interaction at  $p < 0.05$ .

Abbreviations: APOE4 = Apolipoprotein epsilon 4 (carriers, APOE4+ vs. non-carriers, APOE4-); CNT = asymptomatic perimenopausal women by age; PERI = symptomatic perimenopausal women; MENO = postmenopausal women
